# Supplementary material
Source: publisher figshare collection journal article supplement (https://karger.figshare.com/ndownloader/files/14629904)
Supplement: Supplementary file 1 [file 14629904]

**Figure S1.** **Myeloid cell-specific FABP5 transgenic mice.** **A.** Linear schematicof the construct used to generate FABP5 transgenic mice (FABP5-Tg). **B.** FABP5-YFP expression in splenocytes of transgenic negative and positive mice crossed with LysM-Cre mice (gated on live cells, singlets, CD11b+ CD11c+ cells).
